# Supplementary material for: Construction and photoswitching properties of fluorescent diarylethenes
Source: Royal Society of Chemistry journal article supplement (doi:10.1039/b613558g), 2006-12-05
Supplement: b613558g.pdf [file b613558g.pdf]

## Supplementary data

### Novel fluorescent diarylethenes: synthesis and photoswitching properties of dithienylethene with 4,5-diarylimidazole substituted groups

Nan Xie and Yi Chen\*

*Technical Institute of Physics and Chemistry, The Chinese Academy of Science,  
Beijing, 100080, China. E-mail: [yichencas@yahoo.com.cn](mailto:yichencas@yahoo.com.cn)*

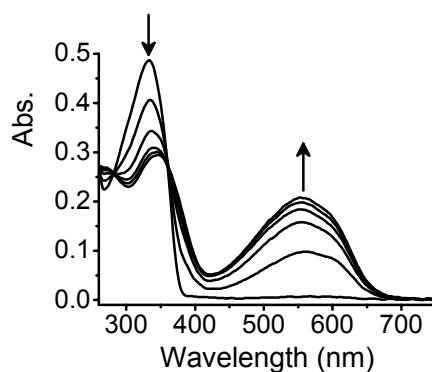

**Fig. S1.** Absorption changes of photocyclization of diarylethene **2a** with 360 nm light irradiation ( $1 \times 10^{-5}$  M, DMSO)

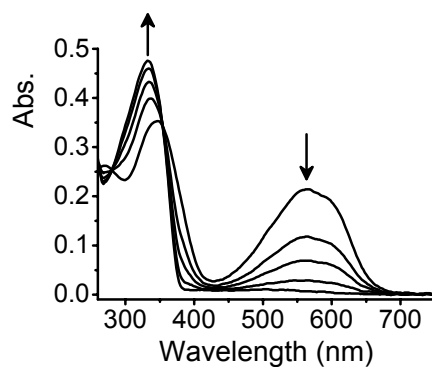

**Fig. S2.** Absorption changes of photobleaching of diarylethene **2b** with  $\geq 450$  nm light irradiation ( $1 \times 10^{-5}$  M, DMSO)

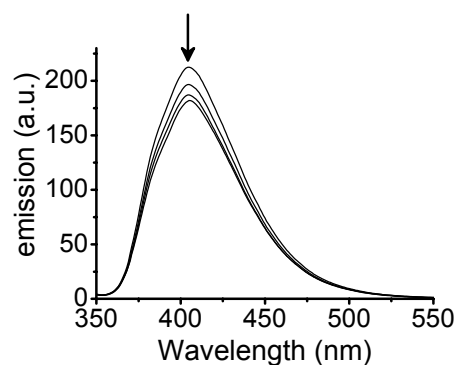

**Fig. S3.** Fluorescence emission of **2a** together with fluorescence changes of **2a** with 360 nm light irradiation ( $1 \times 10^{-5}$ , DMSO,  $\lambda_{\text{ex}} = 350$  nm).

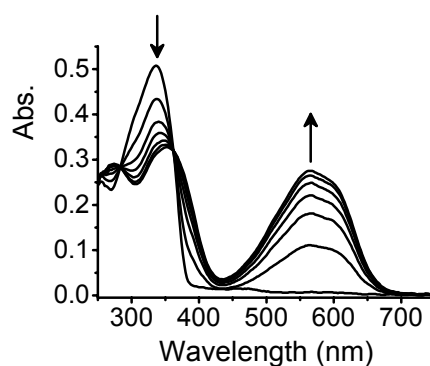

**Fig. S4.** Absorption changes of photocyclization of diarylethene **3a** with 360 nm light irradiation ( $1 \times 10^{-5}$  M, DMSO).

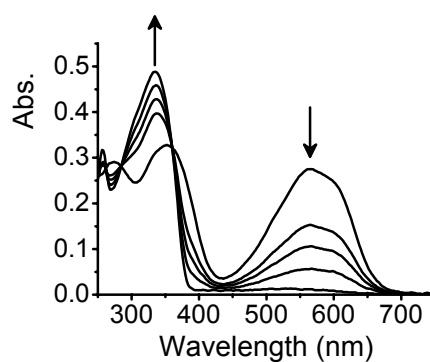

**Fig. S5.** Absorption changes of photobleaching of diarylethene **3b** with  $\geq 450$  nm light irradiation ( $1 \times 10^{-5}$  M, DMSO).

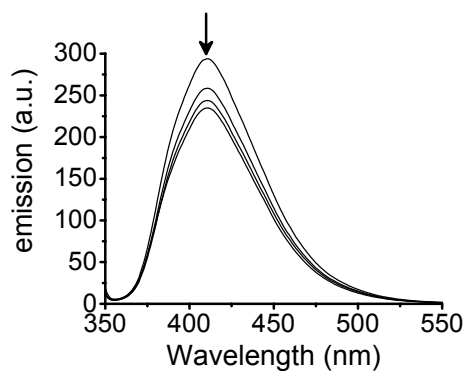

**Fig. S6.** Fluorescence emission of **3a** together with fluorescence changes of **3a** with 360 nm light irradiation ( $1 \times 10^{-5}$ , DMSO,  $\lambda_{\text{ex}} = 350$  nm).

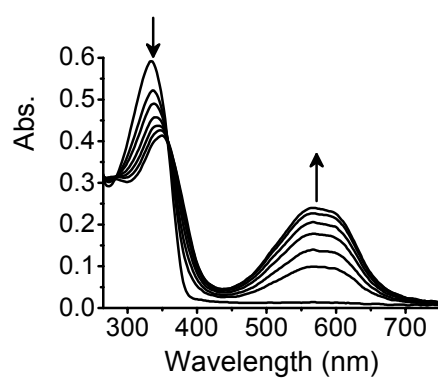

**Fig. S7.** Absorption changes of photocyclization of diarylethene **4a** with 360 nm light irradiation ( $1 \times 10^{-5}$  M, DMSO).

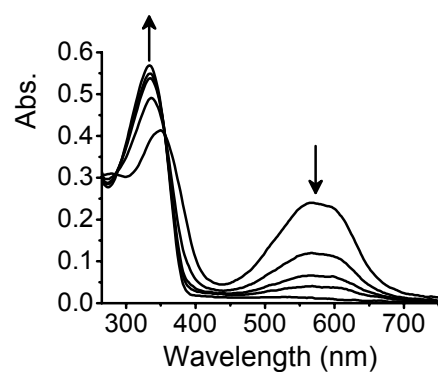

**Fig. S8.** Absorption changes of photobleaching of diarylethene **4b** with  $\geq 450$  nm light irradiation ( $1 \times 10^{-5}$  M, DMSO).

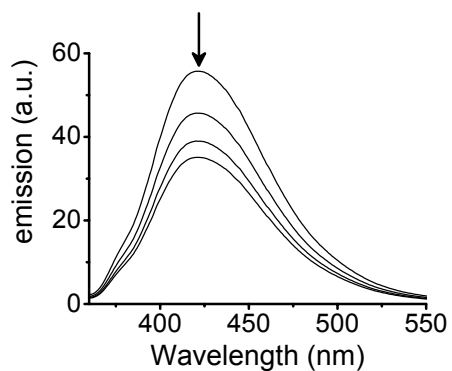

**Fig. S9.** Fluorescence emission of **4a** together with fluorescence changes of **4a** with 360 nm light irradiation ( $1 \times 10^{-5}$ , DMSO,  $\lambda_{\text{ex}} = 350$  nm).

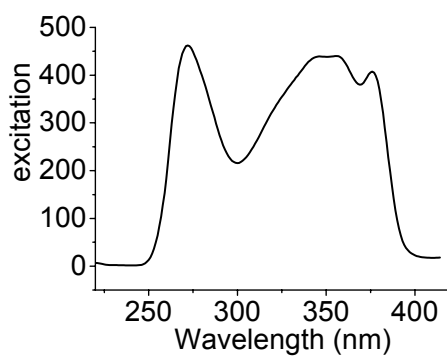

**Fig. S10.** Excitation spectrum of **1b** in DMSO.
